# Supplementary material for: Tungsten Trioxide as a Visible Light Photocatalyst for Volatile Organic Carbon Removal
Source: PubMed Central journal article supplement (PMC6271203; doi:10.3390/molecules191117747), 2014-10-31

## Supplementary Materials

**Figure S1.** XRD spectra for the different WO<sub>3</sub> photocatalysts: (A) Hydrothermally synthesised WO<sub>3</sub> with no additives (W0); (B) Hydrothermally synthesised WO<sub>3</sub> with Na<sub>2</sub>SO<sub>4</sub> added at a SO<sub>4</sub><sup>2-</sup>:WO<sub>4</sub><sup>2-</sup> ratio of 0.3 (W0.3NaS); (C) Hydrothermally synthesised WO<sub>3</sub> with Na<sub>2</sub>SO<sub>4</sub> added at a SO<sub>4</sub><sup>2-</sup>:WO<sub>4</sub><sup>2-</sup> ratio of 7.6 (W7.6NaS); (D) Hydrothermally synthesised WO<sub>3</sub> with H<sub>2</sub>SO<sub>4</sub> added at a SO<sub>4</sub><sup>2-</sup>:WO<sub>4</sub><sup>2-</sup> ratio of 0.3 (W0.3HS); (E) Hydrothermally synthesised WO<sub>3</sub> with H<sub>2</sub>SO<sub>4</sub> added at a SO<sub>4</sub><sup>2-</sup>:WO<sub>4</sub><sup>2-</sup> ratio of 7.6 (W7.6HS); (F) Commercial Sigma Aldrich WO<sub>3</sub> (WSA). m = monoclinic (WO<sub>3</sub>), o = orthogonal (WO<sub>3</sub>· $\frac{1}{3}$ H<sub>2</sub>O) and h = hexagonal (WO<sub>3</sub>).

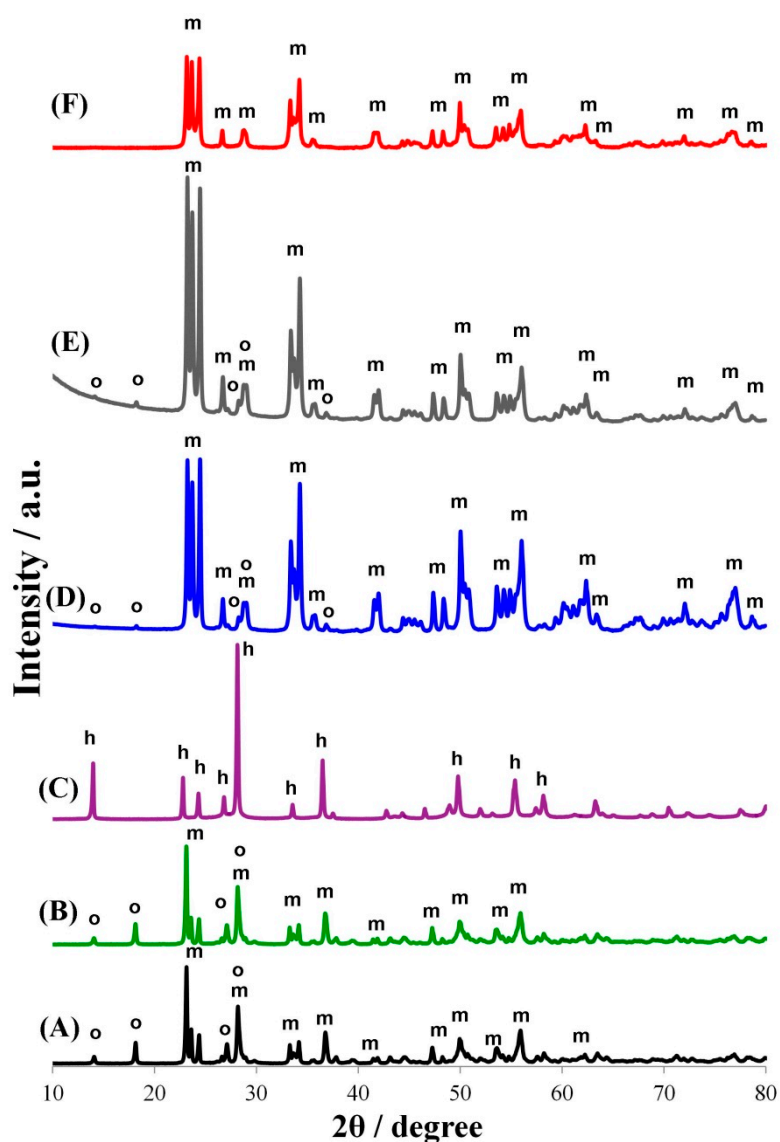

**Figure S2.** Modified Kubelka–Munk Plot of neat WO<sub>3</sub> nanocubes (W7.6HS), Sigma Aldrich WO<sub>3</sub> (WSA) and WO<sub>3</sub> nanorod bundles (W7.6NaS).

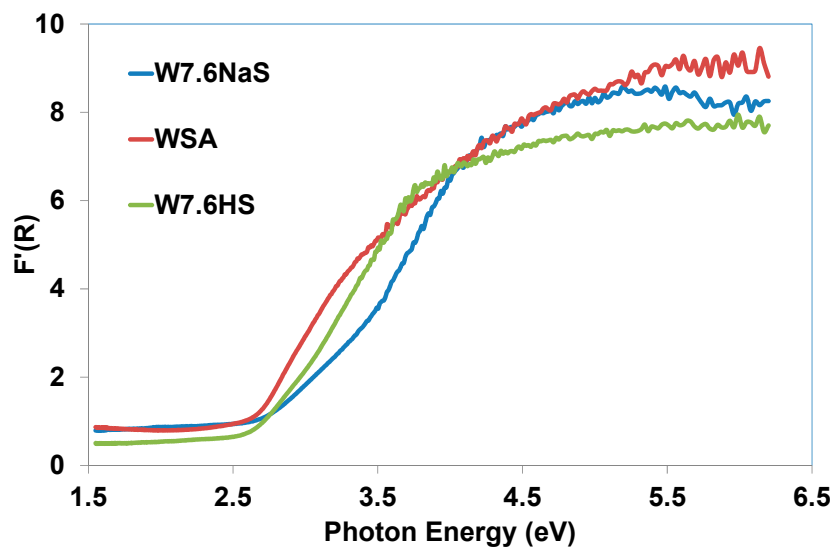

Supplement: molecules-19-17747-s001.pdf [file molecules-19-17747-s001.pdf]
